# Supplementary material
Source: PubMed Central journal article supplement (PMC1356092)
Supplement: pcbi.0020004.st001.pdf [file pcbi.0020004.st001.pdf]

Supplementary Table S1. Present-absent detection of alternative splice junction RNA.

| Alternative Event           | Count | With Probes | Expressed | Alternative | Percent Alternative |
|-----------------------------|-------|-------------|-----------|-------------|---------------------|
| Cassette exons              | 5058  | 3217        | 1297      | 376         | 29.0%               |
| Alternative 5' splice sites | 746   | 350         | 136       | 41          | 30.1%               |
| Alternative 3' splice sites | 1554  | 530         | 211       | 39          | 18.5%               |
| Mutually Exclusive exons    | 47    | 27          | 15        | 8           | 53.3%               |
| Alternative Txn Starts      | 4262  | 1537        | 585       | 148         | 25.3%               |
| Alternative Txn Ends        | 3340  | 555         | 189       | 51          | 27.0%               |

Table S1. Expression counts for different types of alternative splicing events. "Count" indicates number of events observed in the EST/mRNA data. "With Probes" indicates events that contain probes on the array. "Expressed" indicates events with at least one isoform that is expressed at false positive rate of 0.1. "Alt" indicates events where at least two isoforms are expressed at false positive rate of 0.1 each. "Percent" indicates the percentage of events with at least one isoform expressed that also had at least one other mutually exclusive isoform expressed.
