# Supplementary material
Source: PubMed Central journal article supplement (PMC1356092)
Supplement: pcbi.0020004.st002.pdf [file pcbi.0020004.st002.pdf]

Supplementary Table S2. RT-PCR Testing of Array Predictions

| Gene             | Junction                | Feature                       | 3-Cerebellar<br>Hemispheres | 6-Testis | 7-Lung | 10-Spleen | 13-Kidney | 16-Stomach | 19-Liver | 22-Heart | 25-Cortex | 28-Olfactory<br>Bulb | 35-Salivary<br>Gland | 38-Small<br>Intestine | 41-<br>Esophagus | 44-Hind Brain | 48-<br>Cerebellum | 59-Spinal<br>Cord | 60-Skeletal<br>Muscle | 65-Colon | 69-Mammary<br>Gland |
|------------------|-------------------------|-------------------------------|-----------------------------|----------|--------|-----------|-----------|------------|----------|----------|-----------|----------------------|----------------------|-----------------------|------------------|---------------|-------------------|-------------------|-----------------------|----------|---------------------|
| Btd              | G6936684@1918253@_at    | inc                           | NA                          | +        | NA     | NA        | +         | +          | +        | +        | +         | NA                   | NA                   | NA                    | NA               | NA            | NA                | NA                | NA                    | NA       | NA                  |
| Btd              | G6936684@1918253@_at    | skip                          | NA                          | -        | NA     | NA        | -         | -          | -        | -        | -         | NA                   | NA                   | NA                    | NA               | NA            | NA                | NA                | NA                    | NA       | NA                  |
| Ch11             | G7091647@1939347@_at    | inc                           | NA                          | +        | NA     | NA        | +         | +          | +        | +        | +         | NA                   | NA                   | NA                    | NA               | NA            | NA                | NA                | NA                    | NA       | NA                  |
| Ch11             | G7091647@1939347@_at    | skip                          | NA                          | -        | NA     | NA        | -         | -          | -        | -        | -         | NA                   | NA                   | NA                    | NA               | NA            | NA                | NA                | NA                    | NA       | NA                  |
| Hspa4            | G6892948@1912430_RC@_at | inc                           | NA                          | +        | NA     | NA        | +         | +          | +        | +        | +         | NA                   | NA                   | NA                    | NA               | NA            | NA                | NA                | NA                    | NA       | NA                  |
| Hspa4            | G6892948@1912430_RC@_at | skip                          | NA                          | -        | NA     | NA        | -         | -          | -        | -        | -         | NA                   | NA                   | NA                    | NA               | NA            | NA                | NA                | NA                    | NA       | NA                  |
| Ndr3             | G7059194@1930125_RC@_at | inc                           | NA                          | +        | NA     | NA        | +         | +          | +        | +        | +         | NA                   | NA                   | NA                    | NA               | NA            | NA                | NA                | NA                    | NA       | +                   |
| Ndr3             | G7059194@1930125_RC@_at | skip                          | NA                          | -        | NA     | NA        | -         | -          | -        | -        | -         | NA                   | NA                   | NA                    | NA               | NA            | NA                | NA                | NA                    | NA       | -                   |
| Nfia             | G6988337@1933418@_at    | inc                           | NA                          | +        | NA     | NA        | +         | +          | +        | +        | +         | NA                   | NA                   | NA                    | NA               | NA            | NA                | NA                | NA                    | NA       | +                   |
| Nfia             | G6988337@1933418@_at    | skip                          | NA                          | -        | NA     | NA        | -         | -          | -        | -        | -         | NA                   | NA                   | NA                    | NA               | NA            | NA                | NA                | NA                    | NA       | -                   |
| Npnt             | G7016083@1932308_RC@_at | inc                           | NA                          | +        | NA     | NA        | +         | +          | +        | +        | +         | NA                   | NA                   | NA                    | NA               | NA            | NA                | NA                | NA                    | NA       | NA                  |
| Npnt             | G7016083@1932308_RC@_at | skip                          | NA                          | -        | NA     | NA        | -         | -          | -        | -        | -         | NA                   | NA                   | NA                    | NA               | NA            | NA                | NA                | NA                    | NA       | -                   |
| Plocl1           | G7103610@1935013_RC@_at | inc                           | NA                          | +        | NA     | NA        | +         | +          | +        | +        | +         | NA                   | NA                   | NA                    | NA               | NA            | NA                | NA                | NA                    | NA       | +                   |
| Plocl1           | G7103610@1935013_RC@_at | skip                          | NA                          | -        | NA     | NA        | -         | -          | -        | -        | -         | NA                   | NA                   | NA                    | NA               | NA            | NA                | NA                | NA                    | NA       | -                   |
| Prkaca           | G7103610@1935013_RC@_at | inc                           | NA                          | +        | NA     | NA        | +         | +          | +        | +        | +         | NA                   | NA                   | NA                    | NA               | NA            | NA                | NA                | NA                    | NA       | +                   |
| Prkaca           | G7103610@1935013_RC@_at | skip                          | NA                          | -        | NA     | NA        | -         | -          | -        | -        | -         | NA                   | NA                   | NA                    | NA               | NA            | NA                | NA                | NA                    | NA       | -                   |
| Prkaca           | G7243535@1944807@_at    | inc                           | NA                          | +        | NA     | NA        | +         | +          | +        | +        | +         | NA                   | NA                   | NA                    | NA               | NA            | NA                | NA                | NA                    | NA       | +                   |
| Prkaca           | G7243535@1944807@_at    | skip                          | NA                          | -        | NA     | NA        | -         | -          | -        | -        | -         | NA                   | NA                   | NA                    | NA               | NA            | NA                | NA                | NA                    | NA       | -                   |
| Surf4            | G7105085@1927842_RC@_at | inc                           | NA                          | +        | NA     | NA        | +         | +          | +        | +        | +         | NA                   | NA                   | NA                    | NA               | NA            | NA                | NA                | NA                    | NA       | +                   |
| Surf4            | G7105085@1927842_RC@_at | skip                          | NA                          | -        | NA     | NA        | -         | -          | -        | -        | -         | NA                   | NA                   | NA                    | NA               | NA            | NA                | NA                | NA                    | NA       | -                   |
| Vldlr            | G6995328@1926515@_at    | inc                           | NA                          | +        | NA     | NA        | +         | +          | +        | +        | +         | NA                   | NA                   | NA                    | NA               | NA            | NA                | NA                | NA                    | NA       | +                   |
| Vldlr            | G6995328@1926515@_at    | skip                          | NA                          | -        | NA     | NA        | -         | -          | -        | -        | -         | NA                   | NA                   | NA                    | NA               | NA            | NA                | NA                | NA                    | NA       | -                   |
| 4732496019Rik    | G7027520@1931922_RC@_at | inc                           | NA                          | +        | NA     | NA        | +         | +          | +        | +        | +         | NA                   | +                    | NA                    | +                | NA            | +                 | NA                | NA                    | NA       | NA                  |
| 4732496019Rik    | G7027520@1931922_RC@_at | skip                          | NA                          | -        | NA     | NA        | -         | -          | -        | -        | -         | NA                   | -                    | NA                    | -                | NA            | -                 | NA                | NA                    | NA       | NA                  |
| Balap1           | G7153846@1939317_RC@_at | inc                           | NA                          | +        | NA     | NA        | +         | +          | +        | +        | +         | NA                   | +                    | NA                    | +                | NA            | +                 | NA                | NA                    | NA       | NA                  |
| Balap1           | G7153846@1939317_RC@_at | skip                          | NA                          | -        | NA     | NA        | -         | -          | -        | -        | -         | NA                   | -                    | NA                    | -                | NA            | -                 | NA                | NA                    | NA       | NA                  |
| Ndr2             | G6912708@1918655_RC@_at | Ex3 Incl (12/3)               | +                           | -        | NA     | NA        | +         | +          | +        | +        | +         | NA                   | +                    | -                     | NA               | +             | +                 | +                 | +                     | +        | +                   |
| Ndr2             | G6912708@1918655_RC@_at | Ex3 Skip (12/4)               | +                           | -        | NA     | NA        | -         | -          | -        | -        | -         | NA                   | -                    | -                     | NA               | -             | -                 | -                 | -                     | -        | -                   |
| Ctla             | G7075177@1932922@_at    | Ex6 Incl (16/7)               | +                           | -        | NA     | -         | -         | -          | NA       | -        | -         | NA                   | NA                   | -                     | -                | -             | +                 | +                 | +                     | +        | NA                  |
| Ctla             | G7075177@1932922@_at    | Ex6 skip (16/7)               | +                           | -        | NA     | -         | -         | -          | NA       | -        | -         | NA                   | NA                   | -                     | -                | -             | +                 | +                 | +                     | +        | -                   |
| Gaa              | G6941378@1914900@_at    | Ex9 Incl (18/9)               | +                           | +        | +      | NA        | +         | +          | +        | +        | +         | NA                   | NA                   | NA                    | NA               | +             | +                 | +                 | +                     | +        | +                   |
| Gaa              | G6941378@1914900@_at    | Ex9 Skip (18/10)              | +                           | +        | +      | NA        | -         | -          | -        | -        | -         | NA                   | NA                   | NA                    | NA               | -             | -                 | -                 | -                     | -        | -                   |
| Atp6n1a          | G6937984@1914177@_at    | Ex19 Incl (118/19)            | +                           | -        | NA     | -         | -         | -          | NA       | -        | -         | +                    | +                    | +                     | +                | +             | +                 | +                 | +                     | +        | -                   |
| Atp6n1a          | G6937984@1914177@_at    | Ex19 Skip (118/20)            | +                           | -        | NA     | -         | -         | -          | NA       | -        | -         | -                    | +                    | +                     | +                | +             | +                 | +                 | +                     | +        | +                   |
| Ssh3bp1 / Abi2   | G7125552@1927684_RC@_at | Ex4 Incl (14/5)               | +                           | +        | +      | NA        | +         | +          | +        | +        | +         | NA                   | +                    | +                     | +                | +             | +                 | +                 | +                     | +        | +                   |
| Ssh3bp1 / Abi2   | G7125552@1927684_RC@_at | Ex4 Skip (13/5)               | +                           | +        | +      | NA        | -         | -          | -        | -        | -         | NA                   | +                    | +                     | +                | +             | +                 | +                 | +                     | +        | +                   |
| Add3             | G7037819@1927037@_at    | Ex14 Incl (114/15)            | +                           | +        | +      | +         | +         | +          | +        | +        | +         | NA                   | +                    | -                     | -                | +             | +                 | +                 | +                     | +        | +                   |
| Add3             | G7037819@1927037@_at    | Ex14 Skip (113/15)            | +                           | +        | +      | +         | +         | +          | +        | +        | +         | NA                   | +                    | -                     | -                | +             | +                 | +                 | +                     | +        | +                   |
| Reps1            | G6813886@1909758@_at    | Ex9 Incl (19/10)              | +                           | +        | +      | +         | +         | +          | +        | +        | +         | NA                   | +                    | -                     | -                | +             | +                 | +                 | +                     | +        | +                   |
| Reps1            | G6813886@1909758@_at    | Ex9 Skip (18/10)              | +                           | +        | +      | +         | +         | +          | +        | +        | +         | NA                   | +                    | -                     | -                | +             | +                 | +                 | +                     | +        | +                   |
| Palm             | G6916480@1910611@_at    | Ex8 Incl (18/9)               | +                           | +        | +      | +         | +         | +          | +        | +        | +         | NA                   | +                    | -                     | -                | +             | +                 | +                 | +                     | +        | +                   |
| Palm             | G6916480@1910611@_at    | Ex8 Skip (17/9)               | +                           | +        | +      | +         | +         | +          | +        | +        | +         | NA                   | +                    | -                     | -                | +             | +                 | +                 | +                     | +        | +                   |
| Mark3            | G6899622@1916372@_at    | Ex16 Incl (115/16)            | +                           | -        | NA     | -         | -         | -          | NA       | -        | -         | NA                   | NA                   | NA                    | NA               | +             | +                 | +                 | +                     | +        | +                   |
| Mark3            | G6899622@1916372@_at    | Ex16 Skip (115/17), Ex17 Incl | +                           | -        | NA     | -         | -         | -          | NA       | -        | -         | NA                   | NA                   | NA                    | NA               | +             | +                 | +                 | +                     | +        | -                   |
| Mark3            | G6899622@1916372@_at    | Ex17 Incl (117/18)            | +                           | -        | NA     | -         | -         | -          | NA       | -        | -         | NA                   | NA                   | NA                    | NA               | +             | +                 | +                 | +                     | +        | -                   |
| Mark3            | G6899622@1916372@_at    | Ex16,17 Skip (115/18)         | +                           | -        | NA     | -         | -         | -          | NA       | -        | -         | NA                   | NA                   | NA                    | NA               | -             | -                 | -                 | -                     | -        | -                   |
| LOC170731 / Mfn2 | G7102920@1935009_RC@_at | Ex3 Incl (13/4)               | +                           | -        | NA     | -         | -         | -          | NA       | +        | +         | NA                   | NA                   | NA                    | +                | -             | NA                | NA                | +                     | +        | +                   |
| LOC170731 / Mfn2 | G7102920@1935010_RC@_at | Ex3 Skip (12/4)               | +                           | +        | +      | NA        | +         | +          | +        | +        | +         | NA                   | NA                   | NA                    | +                | +             | +                 | +                 | +                     | +        | +                   |
| Fgfr1            | G7193738@1944099@_at    | Ex3 Incl (13/4)               | +                           | +        | +      | NA        | +         | +          | +        | +        | +         | NA                   | NA                   | NA                    | NA               | +             | +                 | +                 | +                     | +        | +                   |
| Fgfr1            | G7193738@1944099@_at    | Ex3 Skip (12/4)               | +                           | -        | NA     | -         | -         | -          | NA       | +        | +         | NA                   | NA                   | NA                    | NA               | -             | NA                | +                 | +                     | +        | +                   |

Symbols are: (true/predicted values) +/+ : true positives -/- : true negatives +/- : false negatives -/+ : false positives

All genes were used to validate the simple presence-absence test method. Genes tested in 5 or more different tissues (those below the line) we used to validate the Kruskal-Wallis test for differential tissue expression.
