# Supplementary material
Source: PubMed Central journal article supplement (PMC1356092)
Supplement: pcbi.0020004.st003.pdf [file pcbi.0020004.st003.pdf]

Supplementary Table S3. Exons spliced differently in Brain as compared to other tissues.

| geneName                 | knownGene                | exon size | mm5.exonPos               | flipScore |
|--------------------------|--------------------------|-----------|---------------------------|-----------|
| Smcp1                    | BC006946                 | 81        | chr1:24109958-24110039    | -1.5063   |
| G6872891@J907741@j_at    | G6872891@J907741@j_at    | 158       | chr1:60382871-60383029    | 2.0164    |
| Fn1                      | X93167                   | 273       | chr1:72037459-72037732    | -1.0213   |
| C80879                   | AF151110                 | 41        | chr1:159253712-159253753  | 2.3923    |
| Pbx1                     | AF020197                 | 113       | chr1:168213213-168213326  | -2.8732   |
| Reps1                    | AK041967                 | 81        | chr10:17801476-17801557   | -2.0931   |
| Ptprk                    | L10106                   | 36        | chr10:28351604-28351640   | -4.235    |
| Ddx50                    | AK041281                 | 110       | chr10:62413421-62413531   | 0.703     |
| Ank3                     | L40632                   | 27        | chr10:69753810-69753837   | -3.661    |
| Nnp1                     | U79774                   | 83        | chr10:78295687-78295770   | -0.8485   |
| Ap3d                     | BC053066                 | 204       | chr10:80618285-80618489   | 1.9553    |
| Slc25a3                  | BC018161                 | 125       | chr10:90892848-90892973   | 3.9645    |
| 4632413K17Rik            | BC031768                 | 165       | chr10:127219064-127219229 | 1.6394    |
| BC062928                 | BC062928                 | 119       | chr11:49780121-49780240   | -1.3687   |
| 2810404F18Rik            | AK088090                 | 313       | chr11:54379976-54380289   | -1.0094   |
| 2810404F18Rik            | AK088090                 | 154       | chr11:54396144-54396298   | -1.1094   |
| AA536749                 | U73200                   | 66        | chr11:59384678-59384744   | 2.7242    |
| Ncor1                    | U35312                   | 141       | chr11:61961892-61962033   | 1.1394    |
| Map2k4                   | BC029833                 | 33        | chr11:65388280-65388313   | -2.1692   |
| Map4k6                   | AB035697                 | 111       | chr11:70221144-70221255   | 1.9731    |
| Map4k6                   | AB035697                 | 24        | chr11:70221963-70221987   | -1.9894   |
| Sept4                    | X61452                   | 297       | chr11:87184982-87185279   | -4.7601   |
| Sept4                    | X61452                   | 119       | chr11:87180574-87180693   | 4.9991    |
| Ppp1r9b                  | BC029672                 | 104       | chr11:94670669-94670773   | 3.0412    |
| Myst2                    | BC057102                 | 90        | chr11:94962642-94962732   | 2.624     |
| Psa                      | U35646                   | 131       | chr11:96935018-96935149   | 1.9679    |
| Atp6v0a1                 | AF218249                 | 18        | chr11:100720581-100720599 | -5.4031   |
| AK122484                 | AK122484                 | 99        | chr11:104039804-104039903 | 1.3227    |
| BC037661                 | BC037661                 | 189       | chr11:106766126-106766315 | -1.9259   |
| Wbp2                     | AK004824                 | 135       | chr11:115751674-115751809 | 1.7081    |
| G6869122@J915373@j_at    | G6869122@J915373@j_at    | 86        | chr12:17894317-17894403   | 1.6395    |
| G6835501@J915591_RC@j_at | G6835501@J915591_RC@j_at | 115       | chr12:47018382-47018497   | -0.7682   |
| Arhgap5                  | AK041016                 | 145       | chr12:47761004-47761149   | -2.6146   |
| G6875109@J916256_RC@j_at | G6875109@J916256_RC@j_at | 24        | chr12:95092530-95092554   | -1.9925   |
| Papola                   | U52197                   | 63        | chr12:100552282-100552345 | 2.1499    |
| Evl                      | U72519                   | 63        | chr12:103436448-103436511 | 1.5734    |
| Ppp2r5c                  | AK129042                 | 117       | chr12:105321157-105321274 | 0.9246    |
| Mark3                    | AF240782                 | 45        | chr12:106402416-106402461 | -1.9692   |
| Mark3                    | AF240782                 | 27        | chr12:106400984-106401011 | 3.4598    |
| Kns2                     | AK031309                 | 51        | chr12:106546019-106546070 | -1.043    |
| AK122326                 | AK122326                 | 107       | chr12:107776804-107776911 | 2.4371    |
| Pfkf                     | BC006926                 | 55        | chr13:6386620-6386675     | 1.781     |
| BC028256                 | BC028256                 | 117       | chr13:100588288-100588405 | 1.5823    |
| Klf2a                    | I12644                   | 114       | chr13:103720842-103720956 | -2.8161   |
| Camk2g                   | AK078311                 | 69        | chr14:17031087-17031156   | -0.6215   |
| Camk2g                   | AK078311                 | 33        | chr14:17033114-17033147   | -2.4834   |
| 4921528E07Rik            | BC043475                 | 84        | chr14:38257694-38257778   | 3.4549    |
| Ndrp2                    | BC012963                 | 42        | chr14:44645276-44645318   | 5.4941    |
| Mbnl2                    | AK085709                 | 36        | chr14:112740624-112740660 | -1.7046   |
| 2610103J23Rik            | AF501309                 | 99        | chr15:34176368-34176467   | 1.5191    |
| Oxr1                     | AF324899                 | 81        | chr15:41822962-41823043   | -1.5904   |
| 0910001A06Rik            | AK028062                 | 39        | chr15:64231271-64231310   | -0.4118   |
| Pacsin2                  | AF128535                 | 123       | chr15:83735291-83735414   | 3.2995    |
| Klf21a                   | BC062896                 | 108       | chr15:91347612-91347720   | 1.8346    |
| Arf3                     | BC014778                 | 237       | chr15:99203610-99203847   | -2.127    |
| Pcbp2                    | X75947                   | 39        | chr15:102970638-102970677 | 1.597     |
| 1200013P24Rik            | BC004837                 | 125       | chr16:3594478-3594603     | 1.5865    |
| Mgm1                     | BC046830                 | 50        | chr16:4597749-4597799     | -0.7102   |
| Mgm1                     | BC046830                 | 66        | chr16:4607953-4608019     | 2.1502    |
| Comt                     | AF076156                 | 57        | chr16:18201307-18201364   | 1.0226    |
| Ufd1l                    | U64445                   | 165       | chr16:18592931-18593096   | 0.5995    |
| Eif4a2                   | AK088669                 | 90        | chr16:22955496-22955586   | -1.9615   |
| Eif4a2                   | AK088669                 | 111       | chr16:22956344-22956455   | 3.5343    |
| App                      | X59379                   | 168       | chr16:85426246-85426414   | 5.9513    |
| Ttc3                     | AB008516                 | 43        | chr16:95093583-95093626   | 2.1745    |
| G6966427@J922632_RC@j_at | G6966427@J922632_RC@j_at | 135       | chr17:5980315-5980450     | 3.005     |
| RFWD1                    | BC008598                 | 117       | chr17:23110611-23110728   | -0.5236   |
| Btdb9                    | BC057897                 | 212       | chr17:29132782-29132994   | -2.8068   |
| Brd2                     | AF045462                 | 92        | chr17:32614795-32614887   | 0.9679    |
| Bat3                     | BC026647                 | 54        | chr17:33635450-33635504   | -0.6028   |
| AK011541                 | AK011541                 | 110       | chr17:55028765-55028875   | 2.1152    |
| Pja2                     | AF493070                 | 186       | chr17:62653417-62653603   | 2.7773    |
| Epb4.1l3                 | AF152247                 | 36        | chr17:67705634-67705670   | -2.5414   |
| Epb4.1l3                 | AF152247                 | 123       | chr17:67715637-67715760   | -3.2996   |
| Epb4.1l3                 | AF152247                 | 117       | chr17:67719364-67719481   | -5.3363   |
| G6995877@J924815@j_at    | G6995877@J924815@j_at    | 67        | chr18:25033024-25033091   | -1.3125   |
| Bin1                     | U86405                   | 129       | chr18:32883311-32883440   | -3.1665   |
| AK029322                 | AK029322                 | 80        | chr18:37084598-37084678   | 1.9459    |
| Rnf14                    | AF249667                 | 110       | chr18:38740624-38740734   | 1.4324    |
| Mark2                    | AK045329                 | 162       | chr19:6995224-6995386     | -0.9992   |
| AY427822                 | AY427822                 | 57        | chr19:7181237-7181294     | -1.5817   |
| Coro1b                   | AF143956                 | 203       | chr19:3937811-3938014     | 0.8554    |
| 5730453116Rik            | AK053375                 | 66        | chr19:9631211-9631277     | 1.2522    |
| G6981819@J926487@j_at    | G6981819@J926487@j_at    | 290       | chr19:22990528-22990818   | -0.7817   |
| BC056199                 | BC056199                 | 106       | chr19:26046719-26046825   | -1.822    |
| Vldlr                    | U06670                   | 123       | chr19:26512799-26512922   | 2.0765    |
| Vldlr                    | U06670                   | 84        | chr19:26523084-26523168   | 3.192     |

|                          |                          |     |                          |         |
|--------------------------|--------------------------|-----|--------------------------|---------|
| Atad1                    | BC029085                 | 175 | chr19:32017100-32017275  | -1.9365 |
| AK122487                 | AK122487                 | 168 | chr19:39657509-39657677  | 2.0866  |
| AK122487                 | AK122487                 | 90  | chr19:39731986-39732076  | 1.8635  |
| Stk2                     | AK122218                 | 93  | chr19:46972197-46972290  | 2.4021  |
| Ablim1                   | AK122196                 | 141 | chr19:56435308-56435449  | 3.6529  |
| G7125552@J927679_RC@j_at | G7125552@J927679_RC@j_at | 87  | chr2:22910189-22910276   | 1.9067  |
| G7125552@J927684_RC@j_at | G7125552@J927684_RC@j_at | 15  | chr2:22923219-22923234   | -4.1268 |
| Surf4                    | M63114                   | 77  | chr2:26885629-26885706   | 1.0233  |
| BC027791                 | BC027791                 | 15  | chr2:29974179-29974194   | -4.3725 |
| BC023143                 | BC023143                 | 84  | chr2:35226810-35226894   | 2.0632  |
| Orc4l                    | AJ003140                 | 68  | chr2:48869256-48869324   | -1.0344 |
| Fnbp3                    | AF135439                 | 54  | chr2:53119253-53119307   | 2.767   |
| Ttk1                     | BC051641                 | 69  | chr2:70707497-70707566   | -1.5645 |
| Dncic2                   | AF063231                 | 60  | chr2:71127814-71127874   | -3.7508 |
| Atf2                     | BC042210                 | 97  | chr2:73747960-73748057   | -1.6152 |
| 6330583M11Rik            | BC002138                 | 41  | chr2:150964842-150964883 | 1.6095  |
| Samhd1                   | BC067198                 | 123 | chr2:157164669-157164792 | 1.0726  |
| 3632413B07Rik            | AB093284                 | 80  | chr2:165850276-165850356 | 2.5736  |
| AK129214                 | AK129214                 | 175 | chr2:168267717-168267892 | 1.1603  |
| Dpm1                     | AK004834                 | 69  | chr2:168276077-168276146 | 1.3136  |
| Bcas1                    | AY219233                 | 138 | chr2:170447306-170447444 | -7.0571 |
| Gnas                     | AF107848                 | 45  | chr2:174404211-174404256 | -3.5742 |
| Dnajc5                   | BC012268                 | 53  | chr2:181209352-181209405 | 1.8744  |
| 4932431F02Rik            | AK048286                 | 75  | chr3:90460446-90460521   | 1.6553  |
| 4732496O19Rik            | AF213258                 | 91  | chr3:103947167-103947258 | -2.2145 |
| Sars1                    | AK082793                 | 72  | chr3:108807895-108807967 | -1.3026 |
| Camk2d                   | AK039076                 | 89  | chr3:127323009-127323098 | 2.1947  |
| Rap1gds1                 | BC011279                 | 147 | chr3:139541762-139541909 | 3.0401  |
| AF133818                 | AF133818                 | 109 | chr3:158152010-158152119 | -2.0635 |
| Rod1                     | AK088560                 | 34  | chr4:58814247-58814281   | 0.5474  |
| Eps15                    | L21768                   | 182 | chr4:107728425-107728607 | -2.2761 |
| G7094107@J933920_RC@j_at | G7094107@J933920_RC@j_at | 33  | chr4:116563652-116563685 | -3.4057 |
| 2210021A15Rik            | AB041805                 | 48  | chr4:116757166-116757214 | 0.9563  |
| BC019977                 | BC023677                 | 111 | chr4:124608837-124608948 | -1.9185 |
| Rbbp4                    | U35141                   | 148 | chr4:127704812-127704960 | -1.2306 |
| G7091230@J934506@j_at    | G7091230@J934506@j_at    | 129 | chr4:136511733-136511862 | -0.8612 |
| BC047531                 | BC047531                 | 116 | chr4:136638436-136638552 | -1.3999 |
| Mfn2                     | AF384100                 | 83  | chr4:145788869-145788952 | 7.0757  |
| Kif1b                    | AF090190                 | 18  | chr4:147151286-147151304 | -4.2161 |
| Clstn1                   | BC053843                 | 57  | chr4:147527599-147527656 | -2.764  |
| Cacna2d1                 | U73483                   | 57  | chr5:14682361-14682418   | 6.2346  |
| Cacna2d1                 | U73483                   | 21  | chr5:14701647-14701668   | -5.6941 |
| Ctbp1                    | BC042425                 | 193 | chr5:31717369-31717562   | -0.9477 |
| Add1                     | AF096839                 | 279 | chr5:33043848-33044127   | 0.9955  |
| Add1                     | AF096839                 | 87  | chr5:33066510-33066597   | -0.9116 |
| AK122316                 | AK122316                 | 135 | chr5:61241764-61241899   | -0.8786 |
| Hip2                     | BC002013                 | 94  | chr5:64202917-64203011   | -0.8238 |
| Hip2                     | BC002013                 | 83  | chr5:64218413-64218496   | -1.1829 |
| Hnrpd                    | BC049098                 | 107 | chr5:97285513-97285620   | 1.1623  |
| BC054358                 | BC054358                 | 336 | chr5:97699337-97699673   | -0.7765 |
| Chchd3                   | AK003519                 | 94  | chr6:32673648-32673742   | -2.2083 |
| Immt                     | AK038129                 | 96  | chr6:72080716-72080812   | -2.6188 |
| Copg                     | AF187079                 | 53  | chr6:88225742-88225795   | -0.6794 |
| Mgl1                     | AJ316580                 | 84  | chr6:89151028-89151112   | 5.798   |
| Baiap1                   | AK032350                 | 89  | chr6:94036663-94036752   | -2.6359 |
| AF340029                 | AF340029                 | 67  | chr6:120010274-120010341 | -1.8882 |
| Drpla                    | BC053051                 | 144 | chr6:125361242-125361386 | -1.4042 |
| Csda                     | BC048242                 | 207 | chr6:131684086-131684293 | -2.222  |
| Kras2                    | BC004642                 | 124 | chr6:145385064-145385188 | 1.361   |
| Ppp5c                    | BC003744                 | 242 | chr7:8708333-8708575     | -1.7162 |
| Pld3                     | AF026124                 | 143 | chr7:16480054-16480197   | -1.1337 |
| Sirt2                    | BC021439                 | 47  | chr7:17736535-17736582   | 0.608   |
| Usf2                     | U01663                   | 201 | chr7:19928296-19928497   | -0.9324 |
| BC038157                 | BC038157                 | 176 | chr7:51392314-51392490   | 0.5516  |
| Mfge8                    | BC003892                 | 111 | chr7:66217550-66217661   | 2.2604  |
| Arrb1                    | AK052588                 | 24  | chr7:86871505-86871529   | -0.5712 |
| Tacc2                    | AB041546                 | 126 | chr7:118196540-118196666 | 1.311   |
| BC017520                 | BC017520                 | 160 | chr7:120649119-120649279 | -1.4541 |
| Fgfr1                    | BC010200                 | 267 | chr8:24332778-24333045   | -3.296  |
| Gpsn2                    | BC019984                 | 52  | chr8:82837902-82837954   | -2.3189 |
| Nfix                     | Y07688                   | 148 | chr8:83989978-83990126   | -1.1124 |
| Nfix                     | Y07688                   | 123 | chr8:83997757-83997880   | -0.4703 |
| BC058645                 | BC058645                 | 154 | chr8:103795341-103795495 | 2.0379  |
| AK032084                 | AK032084                 | 145 | chr8:122389607-122389752 | -0.9194 |
| Mrpl4                    | AB049634                 | 24  | chr9:20931996-20932020   | 0.9132  |
| E430039K05Rik            | AK046492                 | 115 | chr9:21997235-21997350   | -0.5833 |
| Aplp2                    | U15571                   | 36  | chr9:31135756-31135792   | -4.6848 |
| 2300004C15Rik            | BC016456                 | 213 | chr9:58118988-58119201   | -0.6564 |
| Tcf12                    | BC037097                 | 72  | chr9:72189645-72189717   | -2.4244 |
| Senp6                    | BC061480                 | 21  | chr9:80502690-80502711   | -1.533  |
| Azi2                     | AK030076                 | 47  | chr9:118031515-118031562 | 2.6125  |
| Cask                     | Y17138                   | 69  | chrX:11884093-11884162   | -1.8176 |
| AK083192                 | AK083192                 | 81  | chrX:125750603-125750684 | 1.1064  |
| AK031374                 | AK031374                 | 108 | chrX:141723672-141723780 | 1.8859  |
