# Supplementary material
Source: PubMed Central journal article supplement (PMC1356092)
Supplement: pcbi.0020004.st004.pdf [file pcbi.0020004.st004.pdf]

### Supplementary Table S4. Exons spliced differently in Muscle as compared to other tissues.

| geneName      | knownGene | exon size | mm5.exonPos               | flipScoreAllTissues |
|---------------|-----------|-----------|---------------------------|---------------------|
| Ndufs1        | BC006660  | 104       | chr1:63564700-63564804    | 1.4101              |
| Ndufs2        | BC016097  | 58        | chr1:171306504-171306562  | -2.3767             |
| Slc25a3       | BC018161  | 125       | chr10:90892848-90892973   | -4.3711             |
| Ccm2          | BC029157  | 174       | chr11:6464752-6464926     | 1.1595              |
| Pdk2          | AF267660  | 114       | chr11:94698987-94699101   | -1.4988             |
| Atp6v0a1      | AF218249  | 18        | chr11:100720581-100720599 | 6.2499              |
| Nkiras1       | AK028539  | 258       | chr14:14949878-14950136   | -1.5397             |
| Mbnl2         | AK085709  | 95        | chr14:112741990-112742085 | 1.795               |
| Tsc2          | U39818    | 129       | chr17:23202122-23202251   | -1.6772             |
| Mapk14        | U10871    | 45        | chr17:27286394-27286439   | 1.5281              |
| 2410001H17Rik | AK009263  | 45        | chr19:3919500-3919545     | 0.566               |
| Vldlr         | U06670    | 123       | chr19:26512799-26512922   | -2.2546             |
| AK122487      | AK122487  | 60        | chr19:39635743-39635803   | -4.0079             |
| AK122487      | AK122487  | 168       | chr19:39657509-39657677   | -2.0285             |
| AK122487      | AK122487  | 90        | chr19:39731986-39732076   | -2.5683             |
| Zfp106        | BC025424  | 2169      | chr2:120315086-120317255  | -1.8328             |
| Idh3b         | BC009022  | 171       | chr2:130028578-130028749  | 7.038               |
| Fxr1h         | BC019139  | 92        | chr3:33862715-33862807    | -3.7742             |
| Capzb         | U10406    | 113       | chr4:137742645-137742758  | -3.056              |
| Sdhb          | BC051934  | 134       | chr4:139422796-139422930  | -1.555              |
| Mfn2          | AF384100  | 83        | chr4:145788869-145788952  | -5.8237             |
| Art3          | AJ311773  | 30        | chr5:91238008-91238038    | -4.7778             |
| Mpp6          | AF161181  | 42        | chr6:50126528-50126570    | -4.4997             |
| Csda          | BC048242  | 207       | chr6:131684086-131684293  | 1.4625              |
| Phkb          | BC053105  | 92        | chr8:85123611-85123703    | 1.8725              |
| Idh3a         | BC049956  | 102       | chr9:54800770-54800872    | 1.8845              |
| Azi2          | AK030076  | 47        | chr9:118031515-118031562  | -3.9122             |
| AK004035      | AK004035  | 91        | chrX:65847312-65847403    | 1.7087              |
